# Supplementary material for: Accessing suberin from cork via ultrafast supercritical hydrolysis
Source: Royal Society of Chemistry journal article supplement (doi:10.1039/d2gc02498e), 2022-01-01
Supplement: d2gc02498e1.pdf [file d2gc02498e1.pdf]

Electronic Supporting Information

**Accessing suberin from cork via ultrafast supercritical hydrolysis**

Elaine G. Mission and Maria Jose Cocero\*

Pressure Technology Research Group. BioecoUva Institute  
Universidad de Valladolid. c/ Dr. Mergelina s/n 47011, Valladolid (Spain)

Email: [elaineg.mission@uva.es](mailto:elaineg.mission@uva.es)

Email: [mjcocero@iq.uva.es](mailto:mjcocero@iq.uva.es)

Table of contents

- SF1. Photos of the original cork biomass and solid hydrolysis products.
- SF2. Typical GC-MS chromatograph for suberinic acid monomers
- SF3. Formation of repolymerization products
- ST1. Chemical summative analysis
- ST2. Summary of suberin compounds identified via GC-MS
- SL. List of Chemicals

Fig. SF1 Photos of the original cork biomass (A) in comparison with the UFC-2 (B) and UFC-3 (C) solid hydrolysis products and the carbohydrate-lignin complex after suberin extraction (D)

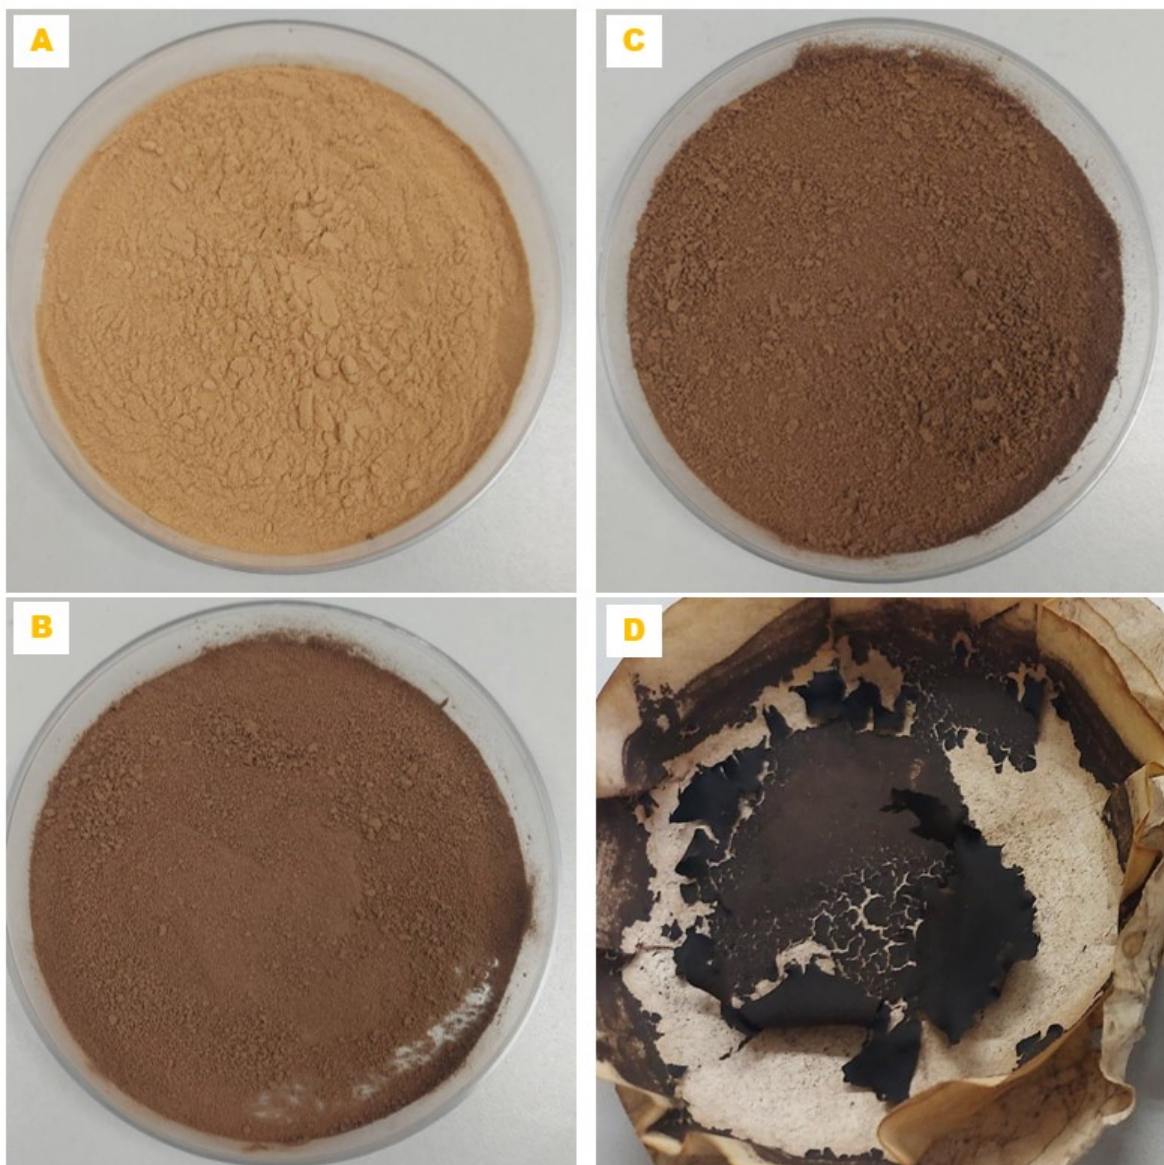

SF2 GC MS data for suberin acid monomer samples

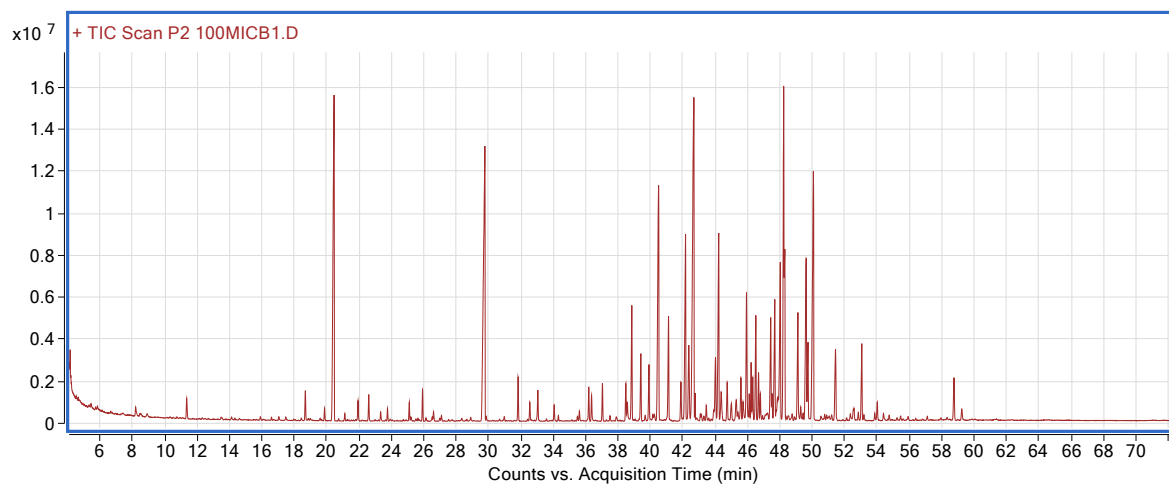

Figure SF2. Representative GC-MS chromatogram for suberin obtained via alkaline methanolysis (sample based from chemical summative analysis)

### SF3. Formation of repolymerization products

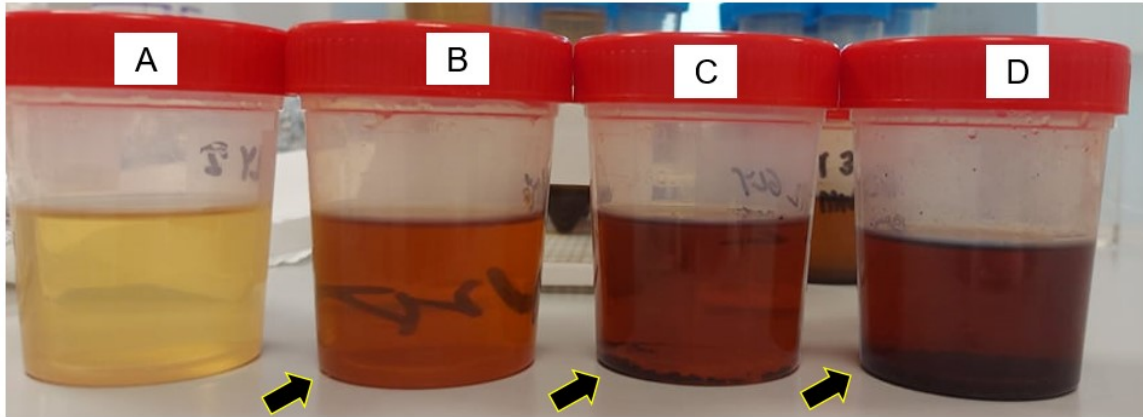

Figure SF3. Observed formation of repolymerization products at the bottom of the solution denoted "char". Aqueous fraction after acidification post-methanolysis (suberin hydrophilics parts) [A] original cork biomass; [B] UFC-3 (395°C, 265 bar, 250 ms); [C] UFC-1 (389°C, 272 bar, 430 ms); [D] UFC-2 (386°C, 265 bar, 1270 ms)

Table ST1 Chemical summative data

Table ST1: Chemical summative analysis data for as-received cork from Ainia Technologies, in comparison with data reported in literatures. Data in the current study is reported as g compound per 100 g of oven dry weight (o.d.w.) cork. Suberin determination for all entries was carried out via alkaline methanolysis.

| Components                 | This study<br>g/ 100 g o.d.w. cork | Cunha et al. 2020 <sup>28</sup> | Pereira 2013 <sup>12</sup> | Pinto et al. 2009 <sup>16</sup> |
|----------------------------|------------------------------------|---------------------------------|----------------------------|---------------------------------|
| <b>TOTAL EXTRACTIVES</b>   | 10.5 ± 1.6                         | 11.4 ± 2.2                      | 16.2 ± 3.9                 | 9                               |
| Hexane                     | 3.6 ± 0.3                          | -                               | -                          | -                               |
| Ethanol                    | 4.0 ± 0.9                          | -                               | -                          | -                               |
| Water                      | 3.8 ± 1.1                          | -                               | -                          | -                               |
| <b>TOTAL SUBERIN</b>       | 47.7 ± 3.9                         | -                               | -                          | -                               |
| Suberin monomers           | 44.1 ± 3.7                         | 41.0 ± 3.4                      | 42.8 ± 6.2                 | 33                              |
| Glycerol <sup>a</sup>      | 3.7 ± 0.2                          | -                               | 3.8 ± 0.6                  | -                               |
| <b>POLYSACCHARIDES</b>     | 14.6 ± 1.8                         | 18.4 ± 5.2                      | 18.2                       | 23                              |
| Cellulose <sup>b</sup>     | 7.6 ± 0.7                          | -                               | -                          | -                               |
| Hemicellulose <sup>c</sup> | 7.0 ± 1.1                          | -                               | -                          | -                               |
| <b>TOTAL LIGNIN</b>        | 21.1 ± 1.2                         | 24.9 ± 3.4                      | 22 ± 3.3                   | -                               |
| Klason lignin              | 20.6 ± 1.1                         | -                               | -                          | 33                              |
| Acid soluble lignin        | 0.5 ± 0.1                          | -                               | -                          | -                               |
| <b>ASH</b>                 | 1.7 ±                              | 0.89 ± 0.02                     | 1.2                        | 4                               |

<sup>a</sup>determined by HPLC <sup>b</sup>as glucose; <sup>c</sup>xylose + arabinose

Table ST2. Identification and quantification of major suberin monomers obtained via alkaline methanolysis (Chem. Summa. – conventional treatment; UFC-1 (389°C, 272 bar, 430 ms); UFC-2 (386°C, 265 bar, 1270 ms); UFC-3 (395°C, 265 bar, 250 ms))

| Compounds                              | Chem. summative |              | UFC-1         |              | UFC-2         |              | UFC-3         |              |
|----------------------------------------|-----------------|--------------|---------------|--------------|---------------|--------------|---------------|--------------|
|                                        | µg/mg           | s.d.         | µg/mg         | s.d.         | µg/mg         | s.d.         | µg/mg         | s.d.         |
| Glycerol                               | 0.639           | 0.008        | 0.395         | 0.007        | 0.436         | 0.008        | 0.651         | 0.002        |
| <b>Fatty alcohols</b>                  | <b>1.149</b>    | <b>0.094</b> | <b>1.588</b>  | <b>0.105</b> | <b>1.704</b>  | <b>0.105</b> | <b>1.624</b>  | <b>0.072</b> |
| Eicosan-1-ol                           | 0.29            | 0.005        | 0.429         | 0.022        | 0.468         | 0.019        | 0.458         | 0.02         |
| Docosan-1-ol                           | 0.859           | 0.089        | 1.159         | 0.083        | 1.237         | 0.086        | 1.166         | 0.052        |
| <b>Fatty acids</b>                     | <b>1.182</b>    | <b>0.107</b> | <b>0.898</b>  | <b>0.051</b> | <b>0.913</b>  | <b>0.069</b> | <b>1.398</b>  | <b>0.051</b> |
| Octadecanoic acid                      | 0.307           | 0.017        | 0.313         | 0.003        | 0.266         | 0.003        | 0.392         | 0.008        |
| Eicosanoic acid                        | 0.076           | 0            | 0.079         | 0.004        | 0.073         | 0.006        | 0.064         | 0            |
| Docosanoic acid                        | 0.799           | 0.09         | 0.507         | 0.044        | 0.574         | 0.06         | 0.942         | 0.043        |
| <b>ω-Hydroxy-acids</b>                 | <b>11.301</b>   | <b>0.936</b> | <b>5.042</b>  | <b>0.487</b> | <b>6.809</b>  | <b>0.5</b>   | <b>8.403</b>  | <b>0.38</b>  |
| 16-hydroxyhexadecanoic acid            | 0.29            | 0.016        | 0.183         | 0.006        | 0.242         | 0.008        | 0.372         | 0.005        |
| 18-hydroxyoctadec-9-enoic acid         | 3.347           | 0.291        | 2.044         | 0.128        | 2.709         | 0.177        | 3.937         | 0.147        |
| 22-hydroxydocosanoic acid              | 3.872           | 0.232        | 0.487         | 0.091        | 0.602         | 0.104        | 0.744         | 0.045        |
| 24-hydroxytetracosanoic acid           | 1.476           | 0.166        | 0.092         | 0.053        | 0.127         | 0.003        | 0.078         | 0.015        |
| 9,10,18-trihydroxyoctadecanoic acid    | 2               | 0.209        | 1.44          | 0.114        | 1.894         | 0.122        | 2.171         | 0.105        |
| 9,10-epoxy-18-hydroxyoctadecanoic acid | 0.317           | 0.022        | 0.795         | 0.095        | 1.236         | 0.086        | 1.1           | 0.063        |
| <b>α,ω-dicarboxylic acids</b>          | <b>5.177</b>    | <b>0.515</b> | <b>11.039</b> | <b>1.269</b> | <b>14.013</b> | <b>1.162</b> | <b>11.994</b> | <b>0.699</b> |
| Hexadecanedioic acid                   | 2.496           | 0.226        | 2.794         | 0.211        | 2.886         | 0.202        | 1.845         | 0.084        |
| Octan-1,8-dioic acid                   | 0.177           | 0.007        | 0.163         | 0.004        | 0.157         | 0.005        | nd.           | Nd           |
| Nonan-1,9-dioic acid                   | n.d.            | n.d.         | 0.335         | 0.005        | 0.267         | 0.004        | 0.257         | 0.014        |
| 9,10-dihydroxyoctadecanedioic acid     | 1.212           | 0.157        | 2.137         | 0.183        | 3.446         | 0.179        | 3.851         | 0.18         |
| Docosanedioic acid                     | 0.17            | 0.007        | 1.895         | 0.272        | 3.016         | 0.318        | 2.391         | 0.188        |
| Decan-1,10-dioic acid                  | 0.927           | 0.102        | 1.379         | 0.161        | 2.039         | 0.171        | 1.892         | 0.136        |
| Undecanedioic acid                     | 0.194           | 0.016        | 2.336         | 0.433        | 2.203         | 0.283        | 1.757         | 0.097        |
| <b>Phenolics</b>                       | <b>5.91</b>     | <b>0.059</b> | <b>6.835</b>  | <b>0.08</b>  | <b>7.063</b>  | <b>0.046</b> | <b>7.146</b>  | <b>0.021</b> |
| cis Ferulic                            | 5.125           | 0.034        | 6.127         | 0.061        | 6.384         | 0.026        | 6.603         | 0.01         |
| Transferulic                           | 0.441           | 0.005        | 0.424         | 0.015        | 0.374         | 0.004        | 0.238         | 0.004        |
| Vanillin                               | 0.344           | 0.02         | 0.284         | 0.004        | 0.304         | 0.016        | 0.304         | 0.007        |
| <b>Extractives</b>                     | <b>0.939</b>    | <b>0.074</b> | <b>2.383</b>  | <b>0.507</b> | <b>2.66</b>   | <b>0.391</b> | <b>1.781</b>  | <b>0.056</b> |
| Lupenone                               | 0.727           | 0.063        | 1.54          | 0.326        | 1.889         | 0.284        | 0.895         | 0.026        |
| Betulinic acid                         | 0.211           | 0.011        | 0.843         | 0.181        | 0.77          | 0.107        | 0.887         | 0.03         |

## SL List of Chemicals

The chemicals used in the experiments were procured from their respective suppliers and were used as-received. Methanol (99.8%), n-hexane (95%), anhydrous sodium sulphate (99%), sulfuric acid (96%), dichloromethane (99%), potassium hydroxide(85%), methyl tert-butyl ether (99.8%), calcium carbonate (98.5%) and glycerol (99%) were procured from Panreac Applichem. Ethanol (99.9%) was sourced from Davila Villalobos, Spain while phenol (99%) and chloroform (99%) were from Acros Organics. Sodium methoxide (95%), BSTFA (99%), anhydrous pyridine (99.8%), chlorotrimethylsilane (98%) and hexadecane (99.9%) were bought from Sigma Aldrich. Deionized water was used as the reaction medium. The HPLC standards (cellobiose, galacturonic acid, glucuronic acid, glucose, mannose, xylose, fructose, arabinose, glyceraldehyde, glycolaldehyde, lactic, formic, acetic and acrylic acids, furfural and 5-hydroxymethylfurfural (5-HMF)) were purchased from Sigma Aldrich.
